# Supplementary material for: trans-Palmitoleic acid promotes adipose thermogenesis to reduce obesity via hypothalamic FFAR1 signaling
Source: Royal Society of Chemistry journal article supplement (doi:10.1039/d4fo00452c), 2024-01-01
Supplement: d4fo00452c1.pdf [file d4fo00452c1.pdf]

## Supplemental Information

### Trans-palmitoleic acid promotes adipose thermogenesis to reduce obesity via hypothalamic FFAR1 signaling

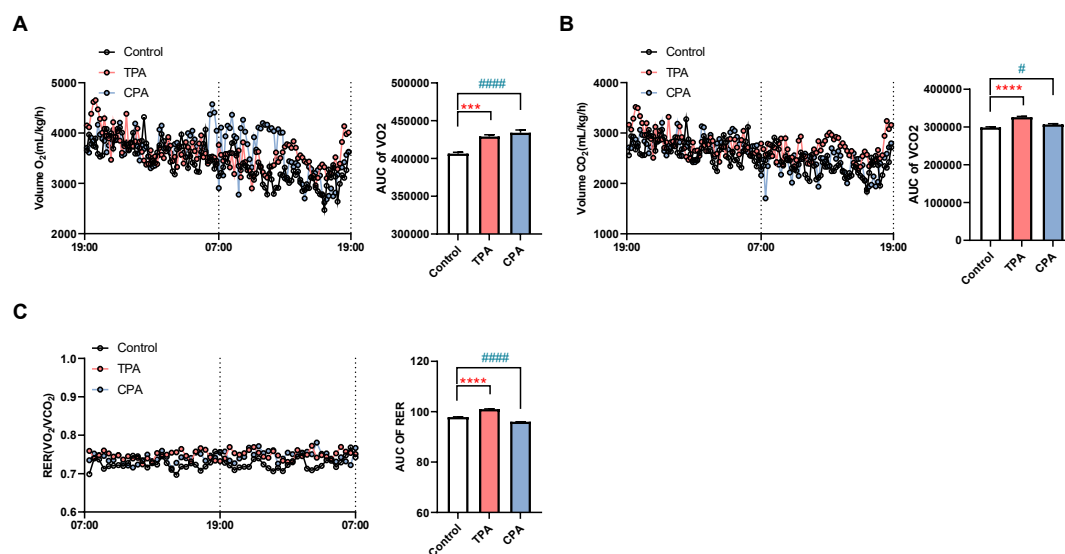

**Fig. S1 Feeding C16 unsaturated FAs promote energy expenditure to reduce diet-induced obesity**

C57BL/6J male mice were fed a HFD (60 kcal% fat) supplemented with 0 (Control), 5mg/kg/BW TPA (red), CPA (blue) and PA (purple) daily for 3 months. (A) Time-course of oxygen consumption, and AUC of oxygen consumption, n=4; (B) Time-course of CO<sub>2</sub> production, and AUC of CO<sub>2</sub> production, n=4; (C) Time-course of RER, and AUC of RER, n=4; Data are mean ± SEM. \*\*\*\*P < 0.0001 TPA versus control; #P < 0.05 and ####P < 0.0001 CPA versus control; Significant differences between mean values were determined by one-way ANOVA with the post hoc Bonferroni's multiple comparisons test.

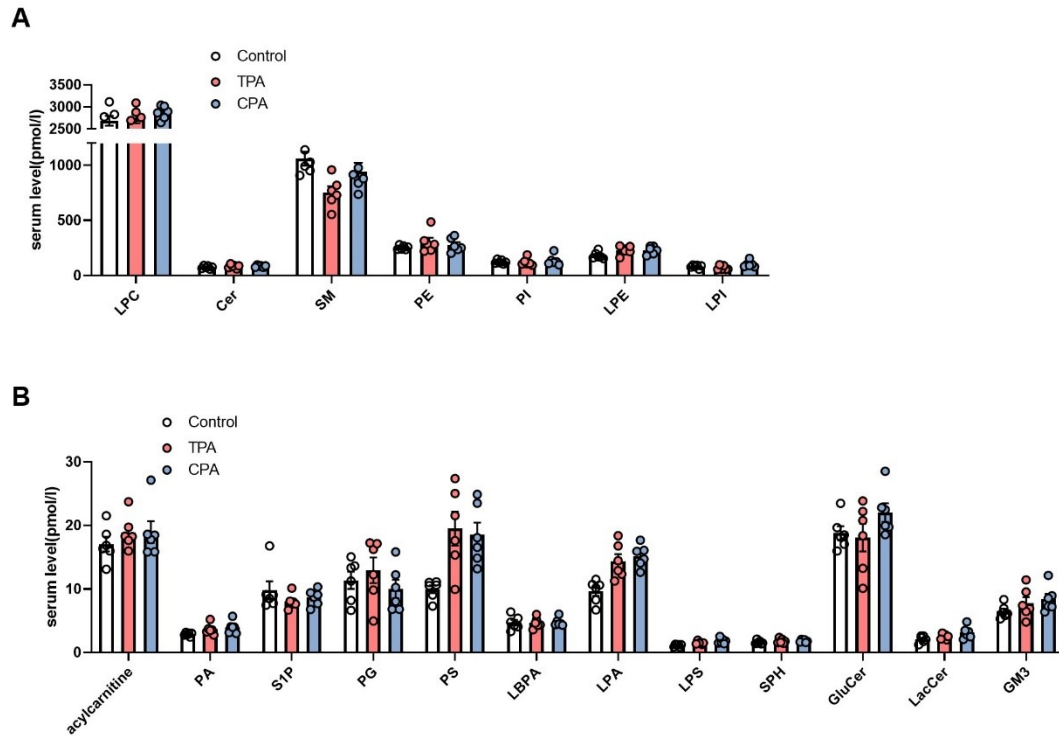

**Fig. S2 Feeding C16 FAs do not influence other lipids serum levels.**

C57BL/6J male mice were fed a HFD (60 kcal% fat) supplemented with 0 (Control), 5mg/kg/BW TPA (red), CPA (blue) and PA (purple) daily for 3 months. (A) The serum level of lipids, n=4; (B) The serum level of lipids, n=4; Data are mean  $\pm$  SEM. Significant differences between mean values were determined by one-way ANOVA with the post hoc Bonferroni's multiple comparisons test.

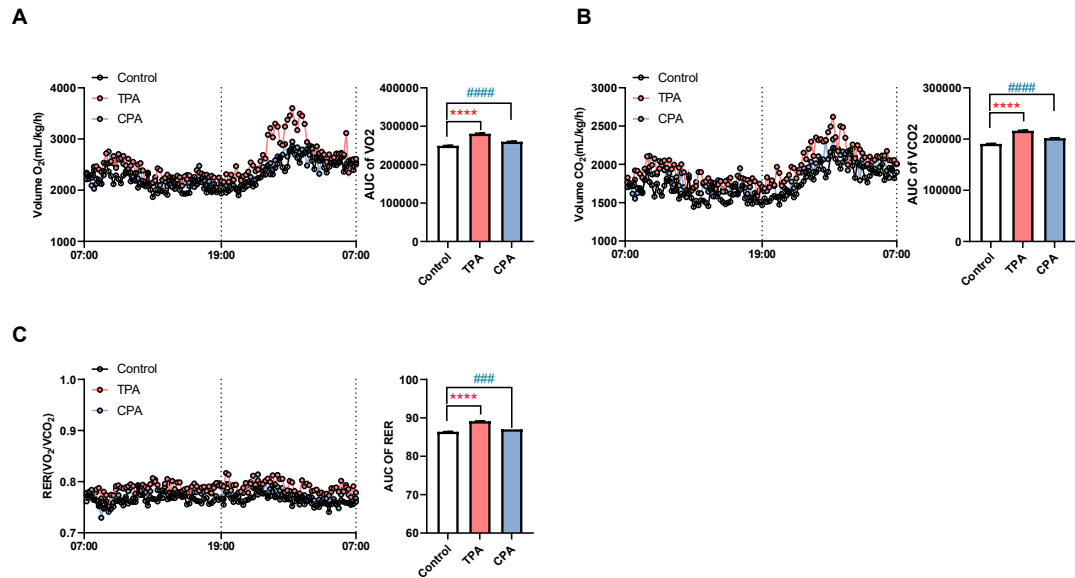

**Fig. S3 Injecting free C16 unsaturated FAs promote energy expenditure to reduce diet-induced obesity**

C57BL/6J male mice were fed with an HFD (60 kcal% fat) and then were injected with 0 (Control), 0.01mmol/kg/BW TPA (red), CPA (blue) and PA (purple) once every third day for continuous 3 months; n=9. (A) Time-course of oxygen consumption, and AUC of oxygen consumption; (B) Time-course of CO<sub>2</sub> production, and AUC of CO<sub>2</sub> production; (C) Time-course of RER, and AUC of RER; Data are mean ± SEM. \*\*\*\*P<0.0001 TPA versus control; ###P<0.001 and #####P<0.0001 CPA versus control; Significant differences between mean values were determined by one-way ANOVA with the post hoc Bonferroni's multiple comparisons test.

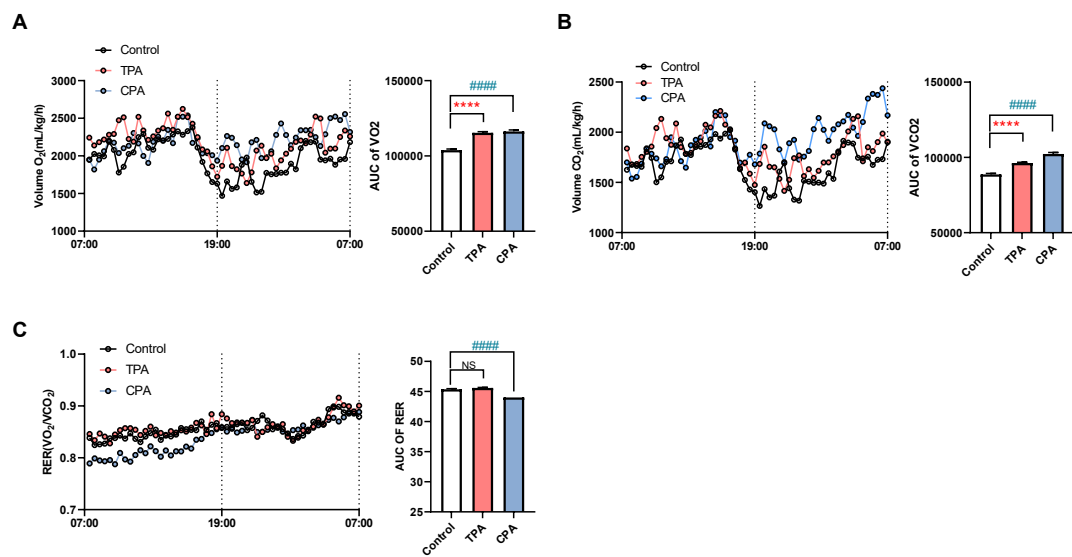

**Fig. S4 Injecting free C16 unsaturated FAs increase energy expenditure and reduce obesity in *ob/ob* mice.**

The leptin-deficient (*ob/ob*) mouse male mice were fed a chow diet and were injected with 0 (Control), 0.01mmol/kg/BW TPA (red), CPA (blue) and PA (purple) once every third day for 2 months; n=6. (A) Time-course of oxygen consumption, and AUC of oxygen consumption; (B) Time-course of CO<sub>2</sub> production, and AUC of CO<sub>2</sub> production; (C) Time-course of RER, and AUC of RER; Data are mean ± SEM. \*\*\*\*P<0.0001 TPA versus control; #####P<0.0001 CPA versus control; Significant differences between mean values were determined by one-way ANOVA with the post hoc Bonferroni's multiple comparisons test.

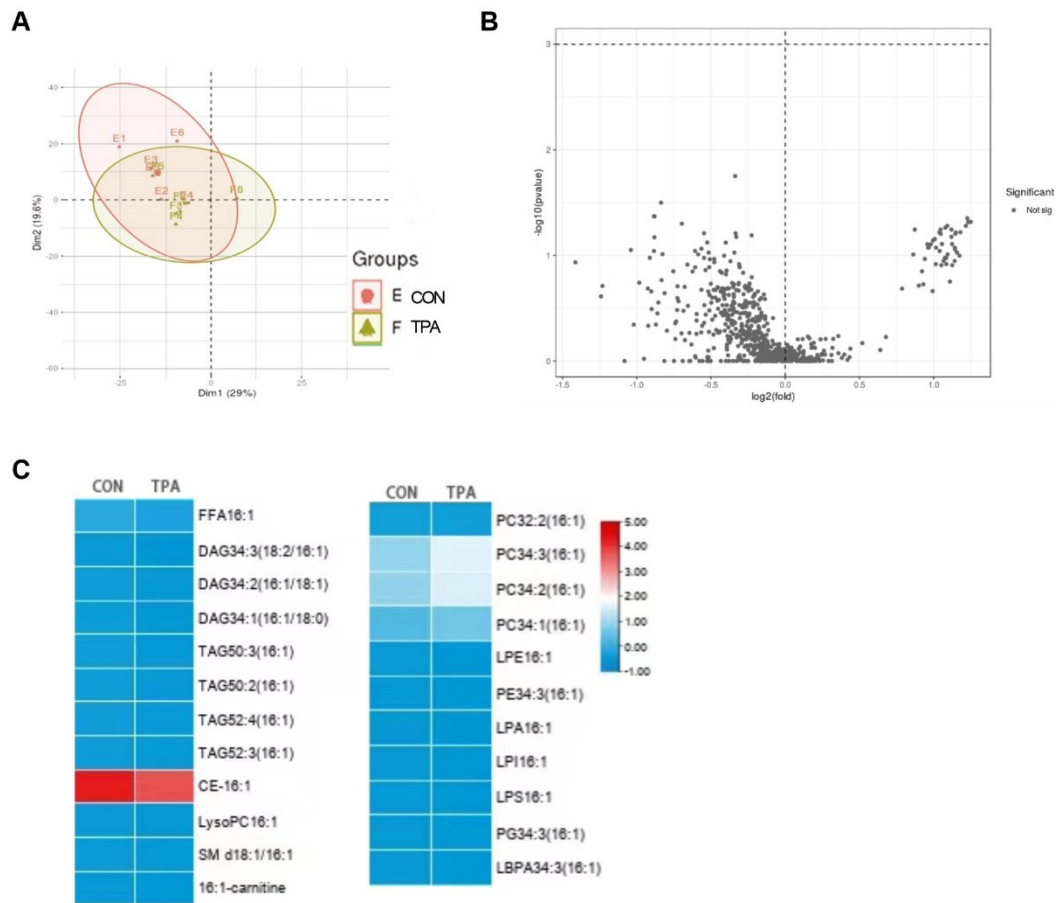

**Fig. S5 TPA treatment does not influence serum lipid metabolites profiles.**

Lipid profiling of mice serum by Liquid Chromatography tandem Mass Spectrometry (LC-MS/MS); (A) Principal component analysis comparing TPA group with control group; (B) Volcano plot showing the  $\log_2$  fold change of lipid metabolite plotted against the  $-\log_{10}$  p value of a one-sided t test. Significance is considered for Benjamini-Hochberg corrected p values  $< 0.05$  and  $\log_2$  fold change  $> 0.58$ ; (C) Heatmap of the product spectrum of C16 fatty acids;

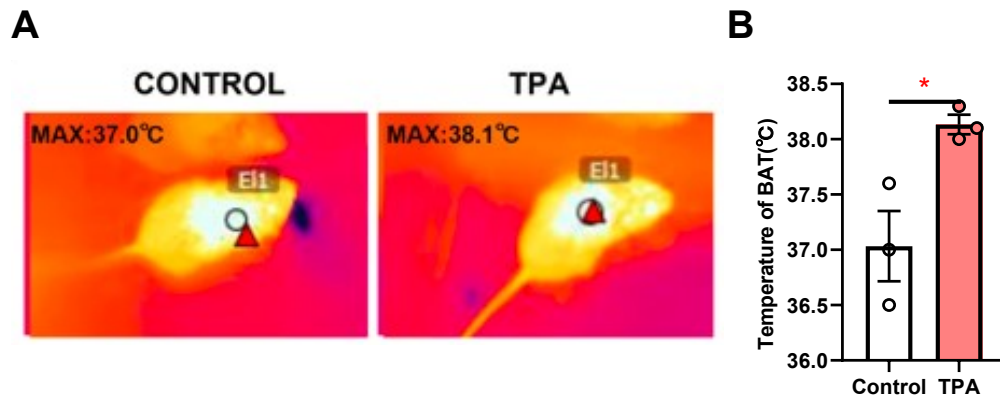

**Fig. S6 The infrared pictures of the interscapular area**

WT mice injected intracerebroventricular (ICV) with TPA or vehicle for 2 weeks, n =4

(A) Representative infrared pictures of the interscapular area in WT mice after ICV injections for 2 weeks; (B) The temperature of BAT after ICV injections of TPA or vehicle for 2 weeks; Data are mean  $\pm$  SEM. \* $P < 0.05$  TPA versus control; Significant differences between 2 mean values were determined by a two-tailed Student's t-test.

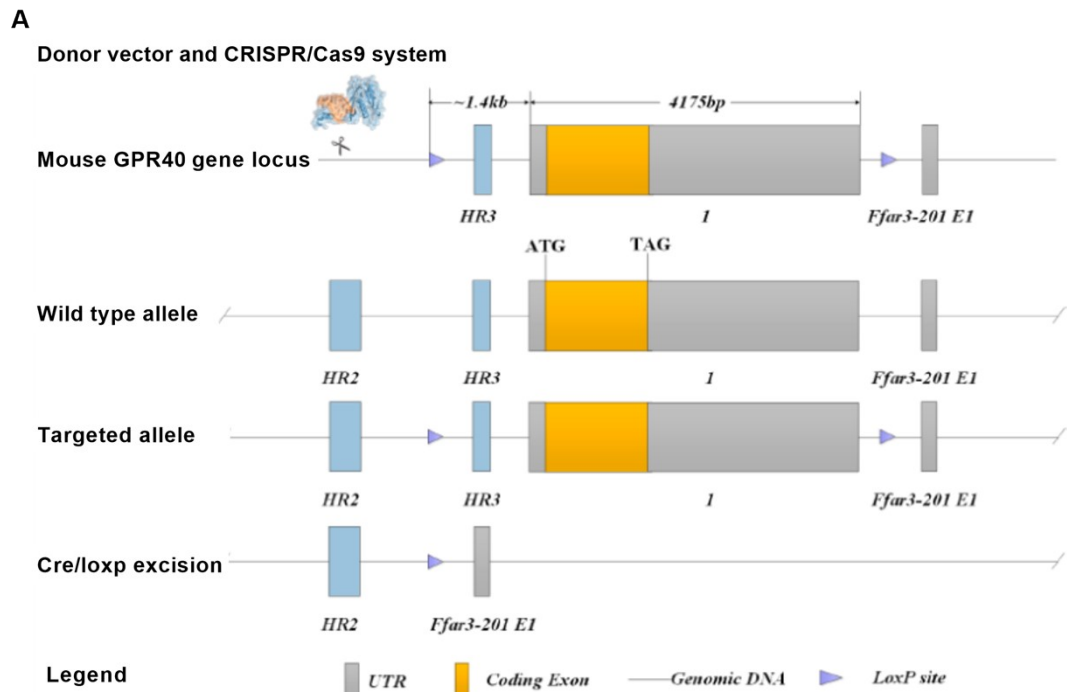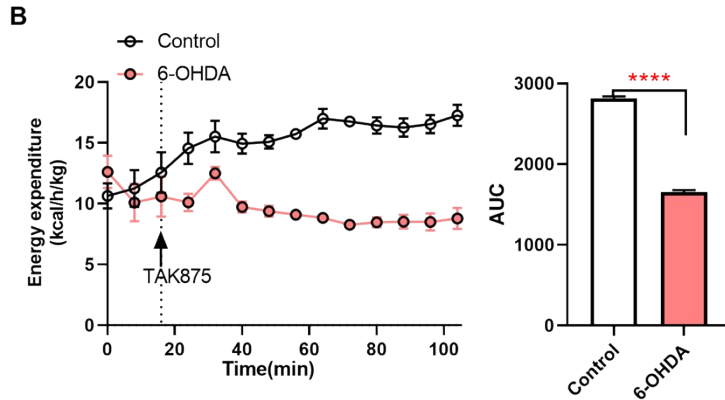

**Fig. S7 Hypothalamic FFAR1 signaling mediates TPA-induced adipose thermogenesis**

(A) Mouse *Ffar1* gene locus and targeting construct. When mating with cre expression allele, sequence between two LoxP sites can be deleted. (B) Time-course of energy expenditure after injected with TAK875 in WT mice, subsequent to intraperitoneal

administration of either vehicle or 6-OHDA two days prior, n =5; Data are mean  $\pm$  SEM. \*\*\*\*P< 0.0001; Significant differences between 2 mean values were determined by a two-tailed Student's t-test.
